# Supplementary material for: The Prognostic Significance of ZNF384 Fusions in Adult Ph-Negative B-Cell Precursor Acute Lymphoblastic Leukemia: A Comprehensive Cohort Study From a Single Chinese Center
Source: PubMed Central journal article supplement (PMC8010301; doi:10.3389/fonc.2021.632532), 2021-03-17
Supplement: DataSheet_1.pdf [file DataSheet_1.pdf]

**Table S1. P value of univariate analysis in B-other ALL patients**

| Variable                                                   | RFS    | OS     |
|------------------------------------------------------------|--------|--------|
| <i>ZNF384</i> fusions (Yes vs No)                          | 0.021  | 0.13   |
| Sex (M vs F)                                               | 0.32   | 0.46   |
| Hemoglobin (g/L) ( $\leq 90$ vs $> 90$ )                   | 0.87   | 0.25   |
| Platelet count ( $\times 10^9/L$ ) ( $\geq 60$ vs $< 60$ ) | 0.0030 | 0.13   |
| Risk (low vs high) (n=224)                                 | 0.060  | 0.023  |
| IKZF1 deletion (Yes vs No)(n=116)                          | 0.77   | 0.43   |
| Treatment modality (allo-HSCT vs chemotherapy alone)       | <0.001 | <0.001 |
| Achieving CR within 4 weeks (Yes vs No)                    | 0.0010 | <0.001 |
| MRD>0.01% at remission (No vs Yes) (n=175)                 | 0.6200 | 0.72   |
| MRD>0.01% after 1st consolidation (No vs Yes) (n=167)      | 0.46   | 0.98   |

**Table S2. Multivariate analysis of RFS and OS in B-other ALL patients**

| Variable                                                   | RFS           |         | OS             |         |
|------------------------------------------------------------|---------------|---------|----------------|---------|
|                                                            | HR (95% CI)   | P value | HR (95% CI)    | P value |
| <i>ZNF384</i> fusions (Yes vs No)                          | -             | 0.64    | -              | 0.69    |
| Platelet count ( $\times 10^9/L$ ) ( $\geq 60$ vs $< 60$ ) | 1.9 (1.2-3.2) | 0.011   | -              | 0.68    |
| Risk (low vs high)                                         | -             | 0.49    | -              | 0.39    |
| Treatment modality (allo-HSCT vs chemotherapy alone)       | 6.6           | <0.001  | 5.0 (3.0-8.5)  | <0.001  |
| Achieving CR within 4 weeks (Yes vs No)                    | 3.8 (1.6-9.0) | 0.0030  | 7.5 (4.1-13.4) | <0.001  |

**Figure legends**

**Figure S1.** The impact of *ZNF384* fusions on RFS and OS considering treatment modality. (A) RFS of patients receiving chemotherapy alone. (B) OS of patients receiving chemotherapy alone. (C) RFS of patients who received allo-HSCT were censored at the time of transplantation. (D) OS of patients who received allo-HSCT were censored at the time of transplantation. (E) RFS of patients receiving allo-HSCT. (F) OS of patients receiving allo-HSCT.

**Figure S2.** Comparison of RFS and OS among subtypes in patients receiving chemotherapy alone. (A) RFS. (B) OS.
